# Supplementary material for: Modulating the intersystem crossing mechanism of anthracene carboxyimide-based photosensitizers via structural adjustments and application as a potent photodynamic therapeutic reagent
Source: Royal Society of Chemistry journal article supplement (doi:10.1039/d2cp02897b), 2022-01-01
Supplement: d2cp02897b1.pdf [file d2cp02897b1.pdf]

**Electronic Supplementary Information for:**

**Modulating the intersystem crossing efficiency of  
anthracene carboxyimide based photosensitizers via  
structural adjustment and application as potent  
photodynamic therapeutic reagent**

*Hui Liang<sup>‡a</sup>, Liting Tang<sup>‡a</sup>, Jiaying He<sup>b</sup>, Jianqing Li<sup>c</sup>, Zeduan Chen<sup>a</sup>, Shuqing Cai<sup>a</sup>,  
Junhong Pang<sup>b</sup>, Zafar Mahmood<sup>\*a</sup>, Wencheng Chen<sup>a</sup>, Ming-De Li<sup>\*b</sup>, Zujin Zhao<sup>\*c</sup>, Yanping  
Huo<sup>a</sup>, Shaomin Ji<sup>\*a</sup>*

*<sup>a</sup> School of Chemical Engineering and Light Industry, Guangdong University of Technology,  
Guangzhou, 510006, PR China*

*. E-mail: [zafarchemistry18@gmail.com](mailto:zafarchemistry18@gmail.com), [smji@gdut.edu.cn](mailto:smji@gdut.edu.cn)*

*<sup>b</sup> Department of Chemistry and Key Laboratory for Preparation and Application of Ordered  
Structural Materials of Guangdong Province, Shantou University, Shantou, 515063, PR China.*

*E-mail: [mdli@stu.edu.cn](mailto:mdli@stu.edu.cn)*

*<sup>c</sup> State Key Laboratory of Luminescent Materials and Devices, Guangdong Provincial Key  
Laboratory of Luminescence from Molecular Aggregates, South China University of Technology,  
Guangzhou 510640, PR China.*

*E-mail: [mszjzhao@scut.edu.cn](mailto:mszjzhao@scut.edu.cn)*

*<sup>‡</sup>H. L. and L.T.T. contributed equally to this work.*

## Contents

|                                                   |     |
|---------------------------------------------------|-----|
| 1. Synthesis of the Compounds.....                | S3  |
| 2. Molecular Structure Characterization Data..... | S7  |
| 3. Fluorescence Emission Spectra.....             | S18 |
| 4. Fluorescence Emission Decay Curves.....        | S19 |
| 5. Electrochemical Properties.....                | S20 |
| 6. Femtosecond Transient Absorption Spectra.....  | S21 |
| 7. Nanosecond Transient Absorption Spectra.....   | S24 |
| 8. Density Function Theory Calculations.....      | S28 |
| 9. Cell Viability.....                            | S30 |
| 10. References.....                               | S30 |

## 1. Synthesis of the Compounds

**1, 2, Br-ACI** were synthesized according to literature methods<sup>1-3</sup>.

### Synthesis of Br-ACI

**2** (400 mg, 1.22 mmol) was dissolved in a flask with 150 mL ethanol, under N<sub>2</sub> atmosphere, reaction mixture was deoxygenated by using a vacuum pump. Then *n*-butylamine (0.12 ml, 1.22 mmol) was injected into the reaction solution, reflux for 12 h under stirring, and then cool to room temperature. After adding silica gel powder, it is evaporated to powder, and purified by silica gel column (*n*-hexane: dichloromethane =3:1). After purification, a yellow solid (160 mg) was obtained with a yield of 34 %. <sup>1</sup>H NMR (400 MHz, CDCl<sub>3</sub>) δ 10.16 (d, *J* = 8.0 Hz, 1H), 8.81 – 8.58 (m, 2H), 8.10 (d, *J* = 8.5 Hz, 2H), 7.78 – 7.67 (m, 1H), 7.47 – 7.36 (m, 3H), 7.31 (m, 7.0 Hz, 1H), 7.21 (d, *J* = 4.0 Hz, 2H), 7.16 – 7.07 (m, 2H), 6.89 (d, *J* = 8.0 Hz, 2H), 4.38 – 4.26 (t, *J* = 8.0 Hz, 2H), 1.80 (m, 2H), 1.47 (m, 7.5 Hz, 2H), 0.98 (t, *J* = 8.0 Hz, 3H). <sup>13</sup>C NMR (100 MHz, CDCl<sub>3</sub>) δ 165.24, 163.88, 147.21, 137.37, 134.27, 133.58, 133.33, 131.32, 130.75, 130.62, 128.62 – 128.30, 128.16, 126.80, 126.22, 125.14, 122.50, 115.30, 40.53, 30.30, 20.55, 13.93. HR-MS *m/z* calculated for [C<sub>20</sub>H<sub>16</sub>BrNO<sub>2</sub>+H]<sup>+</sup> = 382.04427, found: *m/z* = 382.04369.

### Synthesis of Ph-ACI

Under N<sub>2</sub> atmosphere, **Br-ACI** (80 mg, 0.209 mmol), Phenylbornic acid (25 mg, 0.209 mmol), K<sub>2</sub>CO<sub>3</sub> (173 mg, 1.25 mmol) was dissolved in toluene / ethanol / water (10 ml / 10 ml / 5 ml), reaction mixture was deoxygenated by using a vacuum pump. Then Pd (PPh<sub>3</sub>)<sub>4</sub> (12 mg, 5%) was

added and reaction mixture was heated to 90 °C, reflux 8 h under stirring, then cool to room temperature, extract three times with dichloromethane and water, dry with anhydrous sodium sulfate, after evaporation of solvent under reduced pressure, the crude product purification by column chromatography (silica gel, *n*-hexane: dichloromethane =1:1.5), a yellow product (57 mg) was obtained with a yield of 67 %. <sup>1</sup>H NMR (400 MHz, CDCl<sub>3</sub>) δ 10.14 (d, *J* = 12.0 Hz, 1H), 8.77 (m, 1H), 8.00 (d, *J* = 8.0 Hz, 1H), 7.79 (dd, *J* = 8.0 Hz, 2H), 7.67 – 7.55 (m, 4H), 7.53 – 7.45 (m, 1H), 7.44 – 7.36 (m, 2H), 4.36 – 4.25 (m, 2H), 1.89 – 1.74 (m, 2H), 1.51 (m, 2H), 1.02 (t, *J* = 8.0 Hz, 3H). <sup>13</sup>C NMR (100 MHz, CDCl<sub>3</sub>) δ 165.24, 163.88, 147.21, 137.37, 134.27, 133.58, 133.33, 131.32, 130.75, 130.62, 128.62 – 128.30, 128.16, 126.80, 126.22, 125.14, 122.50, 115.30, 40.53, 30.30, 20.55, 13.93. HR-MS *m/z* calculated for [C<sub>26</sub>H<sub>22</sub>NO<sub>2</sub>+H]<sup>+</sup> =380.16505, found: *m/z* = 380.16408.

### Synthesis of PY-ACI

Under N<sub>2</sub> atmosphere, **3** (70 mg, 0.18 mmol), **Br-ACI** (68 mg, 0.18 mmol) and K<sub>2</sub>CO<sub>3</sub> (74 mg, 0.54 mmol) was dissolved in a flask with 10 ml DMF and 0.5 ml water, reaction mixture was deoxygenated by using a vacuum pump. Then Pd (PPh<sub>3</sub>)<sub>4</sub> (10 mg, 5%) was added and reaction mixture was heated to 80 °C for 4 h under stirring, then cool to room temperature, extract three times with dichloromethane and water, dry with anhydrous sodium sulfate, after evaporation of solvent under reduced pressure, the crude product purification by column chromatography (silica gel, *n*-hexane: dichloromethane =1:1.5), a red product (49 mg) was obtained with a yield of 50 %. <sup>1</sup>H NMR (400 MHz, CDCl<sub>3</sub>) δ 10.12 (d, *J* = 8.0 Hz, 1H), 8.70 (m, 1H), 8.33 (d, *J* = 8.0 Hz, 1H), 8.26 (d, *J* = 8.0 Hz, 1H), 8.15 (dd, *J* = 16.0, 8.0 Hz, 2H), 7.88 (dd, *J* = 8.0, 4.0 Hz, 1H), 7.79 – 7.62 (m, 4H), 7.52 – 7.40 (m, 4H), 7.40 – 7.31 (m, 1H), 7.18 – 7.10 (m, 1H), 6.71 (d, *J* = 8.0 Hz, 1H), 4.36 – 4.21 (t, *J* = 8.0 Hz, 2H), 1.85 – 1.70 (m, 2H), 1.49 – 1.39 (m, 2H), 0.97 (t, *J* = 8.0 Hz, 3H).

$^{13}\text{C}$  NMR (100 MHz,  $\text{CDCl}_3$ )  $\delta$  164.30, 162.84, 144.60, 133.73, 133.39, 133.13, 132.53, 131.30, 130.99, 130.71, 129.83, 128.55, 127.90, 127.80 – 127.46, 127.31, 126.37, 125.99, 125.85 – 125.48, 125.06, 124.51, 121.73, 119.96 – 119.45, 118.62, 114.73, 39.56, 29.32, 19.54, 12.94. HR-MS  $m/z$  calculated for  $[\text{C}_{40}\text{H}_{28}\text{NO}_2+\text{H}]^+ = 554.21200$ , found:  $m/z = 554.21185$ .

### Synthesis of NP-ACI

**NP-ACI** synthesized by following the same method as for **Ph-ACI**. The product was obtained as yellow solid (71 mg, 63%).  $^1\text{H}$  NMR (400 MHz,  $\text{CDCl}_3$ )  $\delta$  10.11 (d,  $J = 12.0$  Hz, 1H), 8.69 (d,  $J = 8.0$  Hz, 1H), 8.04 (d,  $J = 8.0$  Hz, 1H), 7.96 (d,  $J = 8.0$  Hz, 1H), 7.80 – 7.67 (m, 2H), 7.67 – 7.58 (m, 1H), 7.49 (d,  $J = 8.0$  Hz, 1H), 7.46 – 7.37 (m, 3H), 7.34 – 7.26 (m, 1H), 7.18 – 7.09 (m, 1H), 6.87 (d,  $J = 8.0$  Hz, 1H), 4.36 – 4.18 (t, 2H), 1.82 – 1.70 (m, 2H), 1.50 – 1.40 (m, 2H), 0.97 (t,  $J = 8.0$  Hz, 3H).  $^{13}\text{C}$  NMR (100 MHz,  $\text{CDCl}_3$ )  $\delta$  164.33, 162.89, 144.64, 133.42, 129.86, 127.37, 125.84, 125.12, 121.66, 114.69, 107.55, 39.56, 29.32, 19.54, 12.92. HR-MS  $m/z$  calculated for  $[\text{C}_{30}\text{H}_{23}\text{NO}_2+\text{H}]^+ = 430.18070$ , found:  $m/z = 430.18010$ .

### Synthesis of AN-ACI

**AN-ACI** synthesized by following the same method as for **Ph-ACI**. The product was obtained as yellow solid (63 mg, 53%).  $^1\text{H}$  NMR (400 MHz,  $\text{CDCl}_3$ )  $\delta$  10.16 (m, 1H), 8.68 (d,  $J = 10.3$  Hz, 2H), 8.10 (d,  $J = 8.0$  Hz, 2H), 7.81 – 7.66 (m, 1H), 7.39 (m, 3H), 7.36 – 7.25 (m, 1H), 7.21 (d,  $J = 4.0$  Hz, 2H), 7.16 – 7.04 (m, 2H), 6.89 (d,  $J = 8.0$  Hz, 2H), 4.40 – 4.21 (t,  $J = 8.0$  Hz, 2H), 1.80 (m, 2H), 1.51 – 1.40 (m, 2H), 0.98 (t,  $J = 8.0$  Hz, 3H).  $^{13}\text{C}$  NMR (100 MHz,  $\text{CDCl}_3$ )  $\delta$  164.39, 162.84, 143.41, 132.99, 132.51, 131.72, 130.26, 129.98, 128.34, 127.69, 127.26, 126.05, 125.79, 125.56, 125.14, 124.73, 124.53, 121.85, 114.98, 39.58, 29.33, 19.56, 12.94. HR-MS  $m/z$  calculated for  $[\text{C}_{34}\text{H}_{26}\text{NO}_2+\text{H}]^+ = 480.19635$ , found:  $m/z = 480.19668$ .

### Synthesis of TPA-ACI

**TPA-ACI** synthesized by following the same method as for **Ph-ACI**. The product was obtained as orange solid (37 mg, 52%). <sup>1</sup>H NMR (400 MHz, CDCl<sub>3</sub>) δ 10.15 (d, *J* = 4.0 Hz, 1H), 8.78 (m, 1H), 8.19 (m, 1H), 7.96 (d, *J* = 8.0 Hz, 1H), 7.87 – 7.77 (m, 1H), 7.68 – 7.60 (m, 1H), 7.55 (dd, *J* = 9.8, 6.5 Hz, 1H), 7.36 (m, 4H), 7.30 – 7.23 (m, 8H), 7.15 – 7.05 (m, 2H), 4.40 – 4.24 (t, 2H), 1.81 (m, 2H), 1.51 (m, 2H), 1.02 (t, *J* = 8.0 Hz, 3H). <sup>13</sup>C NMR (101 MHz, CDCl<sub>3</sub>) δ 164.24, 162.90, 147.12, 146.40, 133.47, 132.65, 132.33, 130.54, 129.72, 129.10, 128.51, 127.64, 127.15, 125.80, 125.13, 124.07, 122.65 (s, 6H), 121.50, 121.01, 114.01, 39.49, 29.27, 19.52, 12.91. HR-MS *m/z* calculated for [C<sub>38</sub>H<sub>30</sub>NO<sub>2</sub>+H]<sup>+</sup> = 547.23855, found: *m/z* = 547.23752.

### Synthesis of PY-Ph

**PY-Ph** synthesized by following the same method as for **Ph-ACI**. The product was obtained as orange solid (45 mg, 58%). <sup>1</sup>H NMR (400 MHz, CDCl<sub>3</sub>) δ 8.16 – 8.07 (m, 4H), 7.67 (d, *J* = 8.0 Hz, 1H), 7.60 (d, *J* = 8.0 Hz, 2H), 7.47 – 7.38 (m, 6H), 7.38 – 7.34 (m, 2H), 7.33 (s, 1H). <sup>13</sup>C NMR (100 MHz, CDCl<sub>3</sub>) δ 133.69, 131.94, 130.39, 130.24, 129.62, 128.94, 128.05, 127.65, 127.3, 126.86, 126.60, 126.33, 125.58, 125.47, 125.06, 119.31, 119.08, 118.89. HR-MS *m/z* calculated for [C<sub>26</sub>H<sub>16</sub>NO<sub>2</sub>+H]<sup>+</sup> = 329.13303, found: *m/z* = 329.13268.

## 2. Molecular structure characterization data

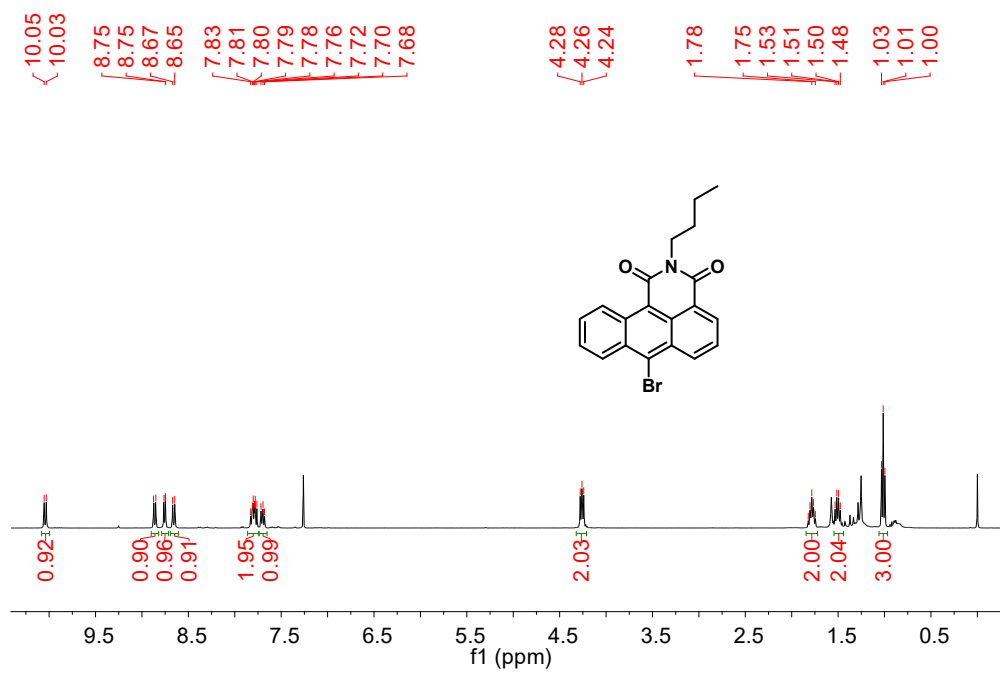

**Figure. S1.** <sup>1</sup>H NMR of Br-ACI (CDCl<sub>3</sub>, 400 MHz).

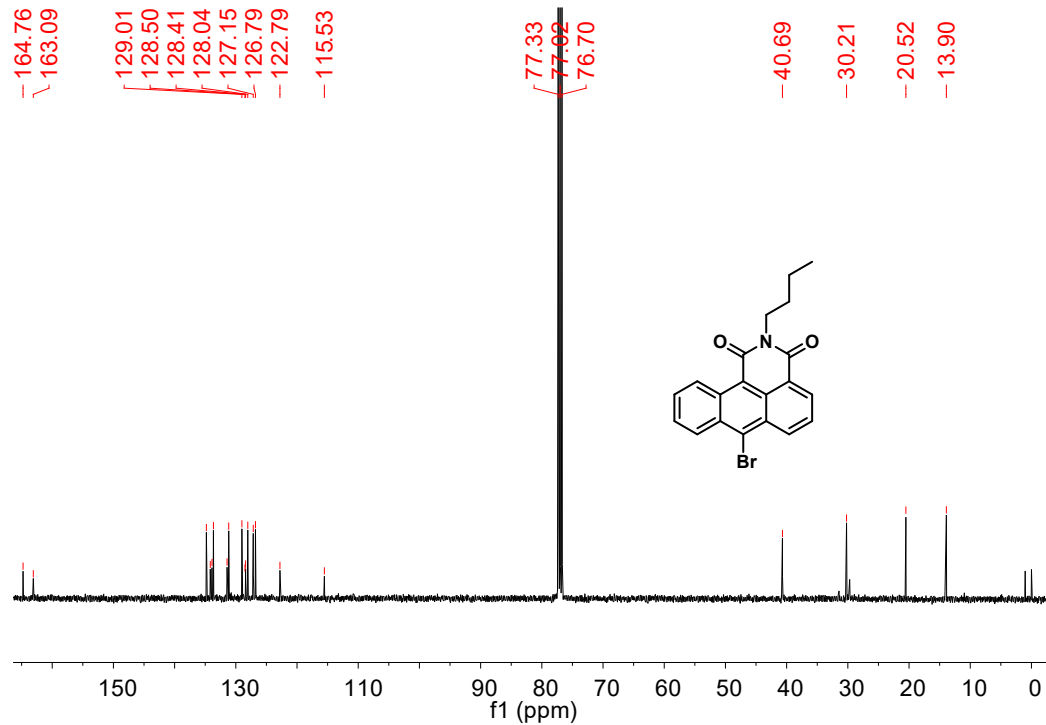

**Figure. S2.**  $^{13}\text{C}$  NMR of Br-ACI ( $\text{CDCl}_3$ , 100 MHz).

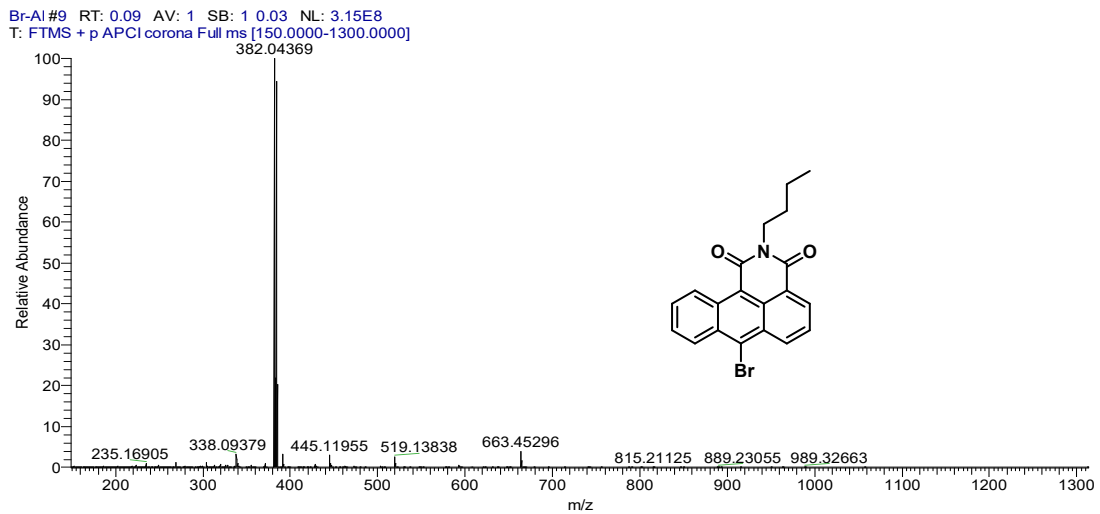

**Figure. S3.** HRMS of Br-ACI.



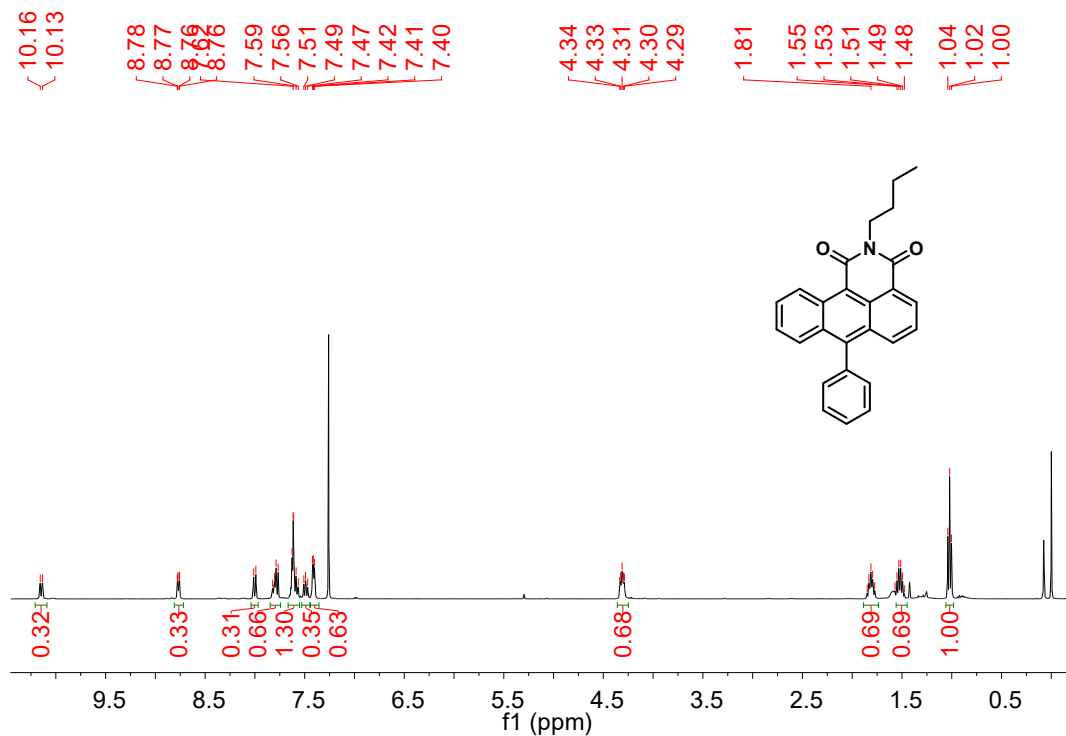

Figure. S4.  $^1\text{H}$  NMR of Ph-ACI ( $\text{CDCl}_3$ , 400 MHz).

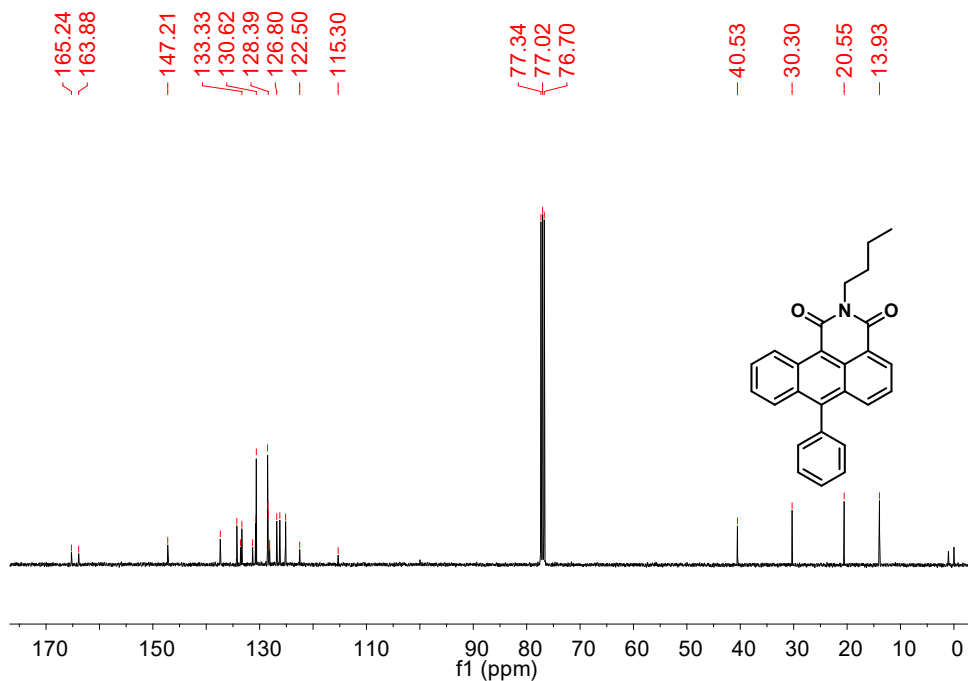

Figure. S5.  $^{13}\text{C}$  NMR of Ph-ACI ( $\text{CDCl}_3$ , 100 MHz).

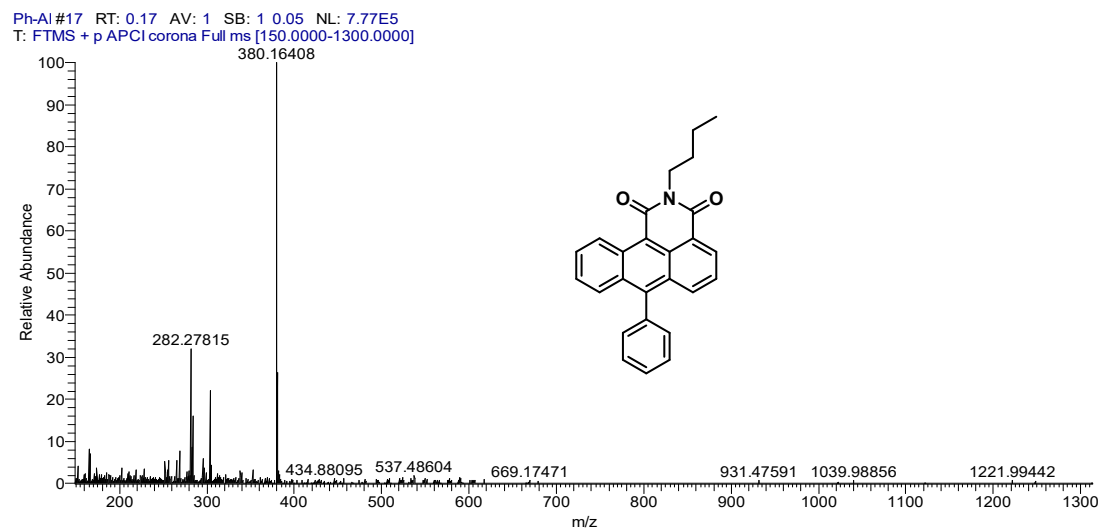

**Figure. S6.** HRMS of Ph-AI.

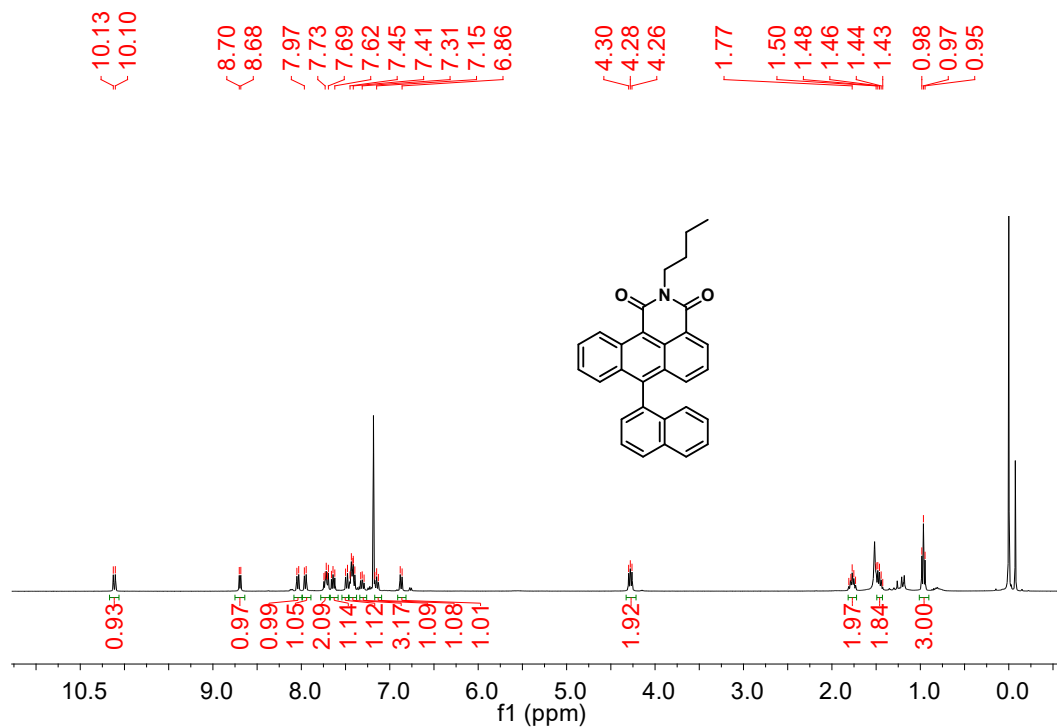

**Figure. S7.**  $^1\text{H}$  NMR of NP-AI ( $\text{CDCl}_3$ , 400 MHz).

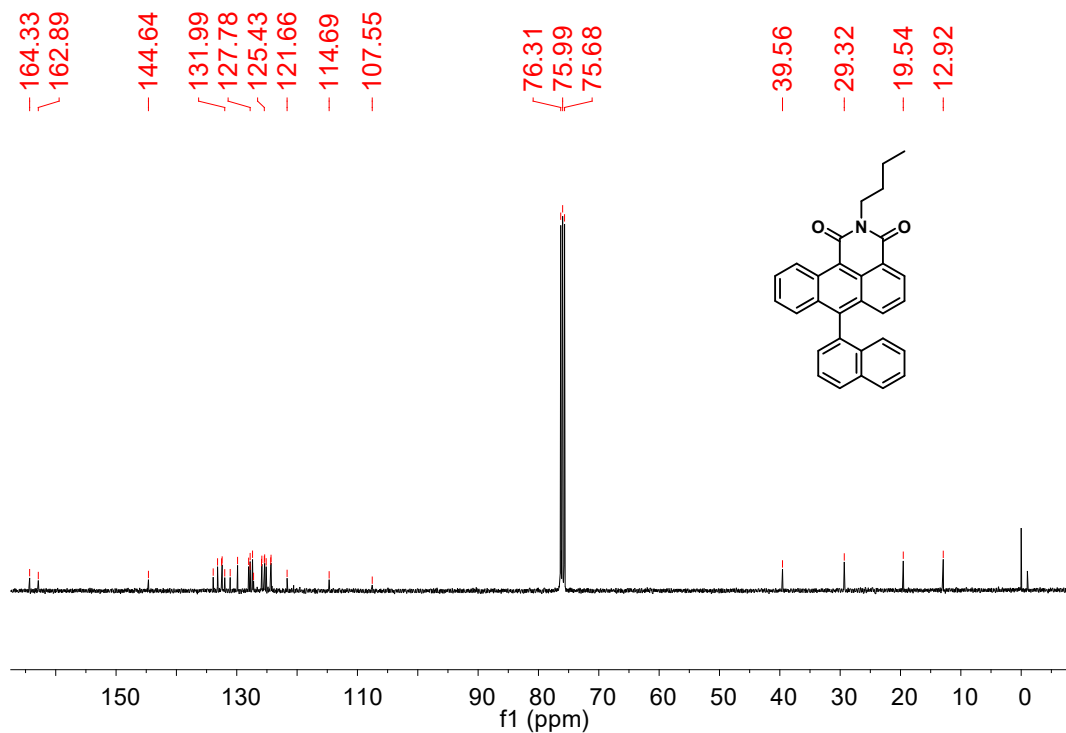

**Figure. S8.**  $^{13}\text{C}$  NMR of NP-ACI ( $\text{CDCl}_3$ , 100 MHz).

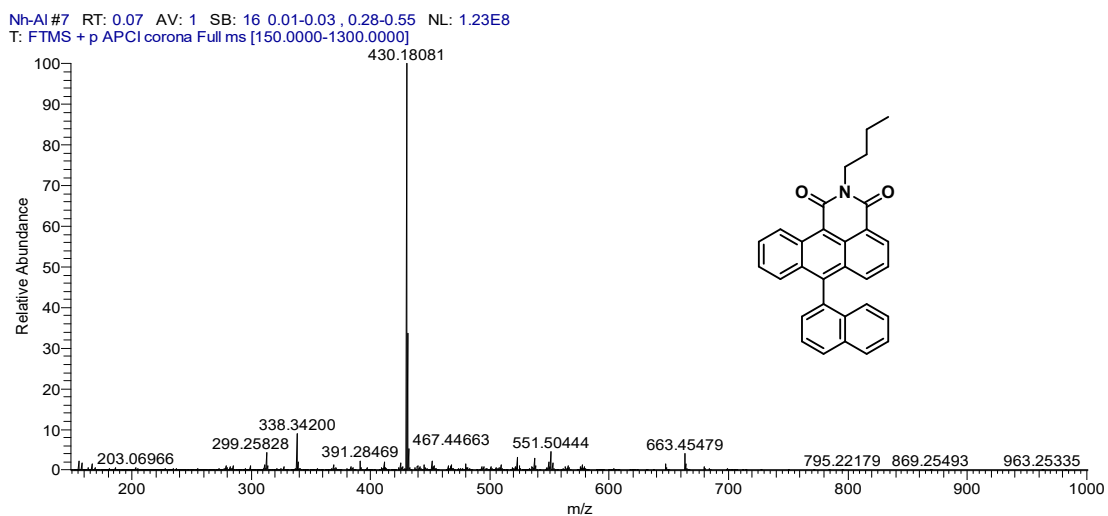

**Figure. S9.** HRMS of NP-ACI.

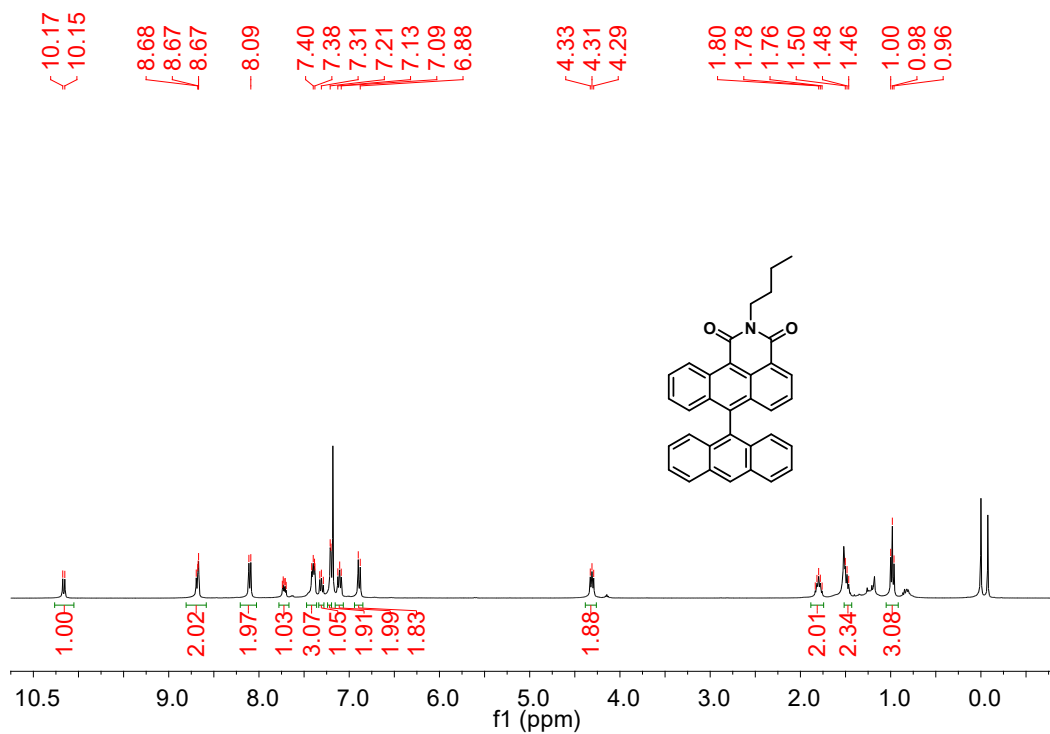

Figure. S10.  $^1\text{H}$  NMR of AN-ACI ( $\text{CDCl}_3$ , 400 MHz).

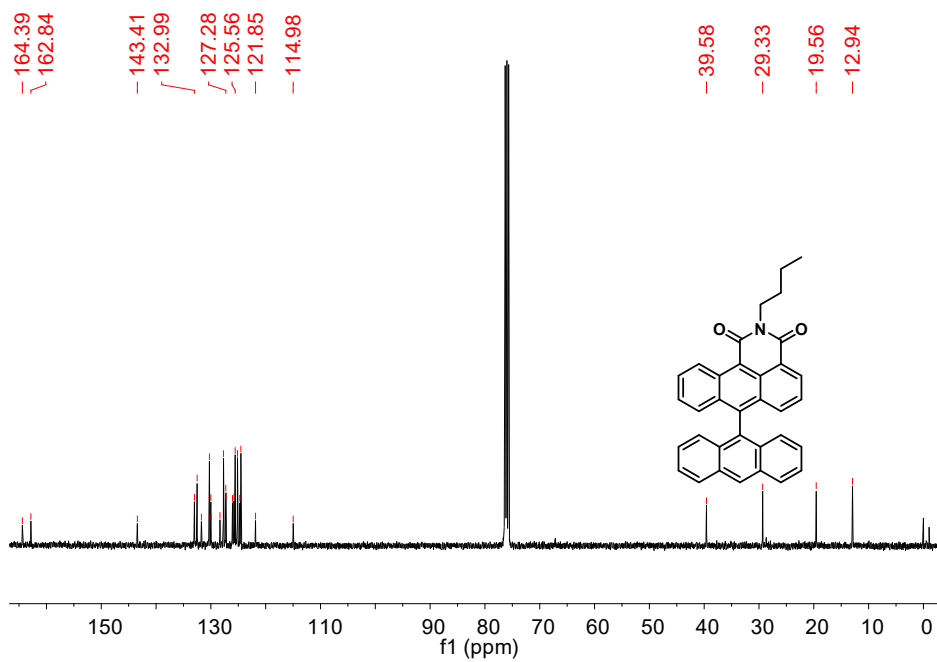

Figure. S11.  $^{13}\text{C}$  NMR of AN-ACI ( $\text{CDCl}_3$ , 100 MHz).

An-AI#9 RT: 0.09 AV: 1 SB: 16 0.01-0.03, 0.29-0.55 NL: 7.58E7  
 T: FTMS + p APCI corona Full ms [150.0000-1300.0000]

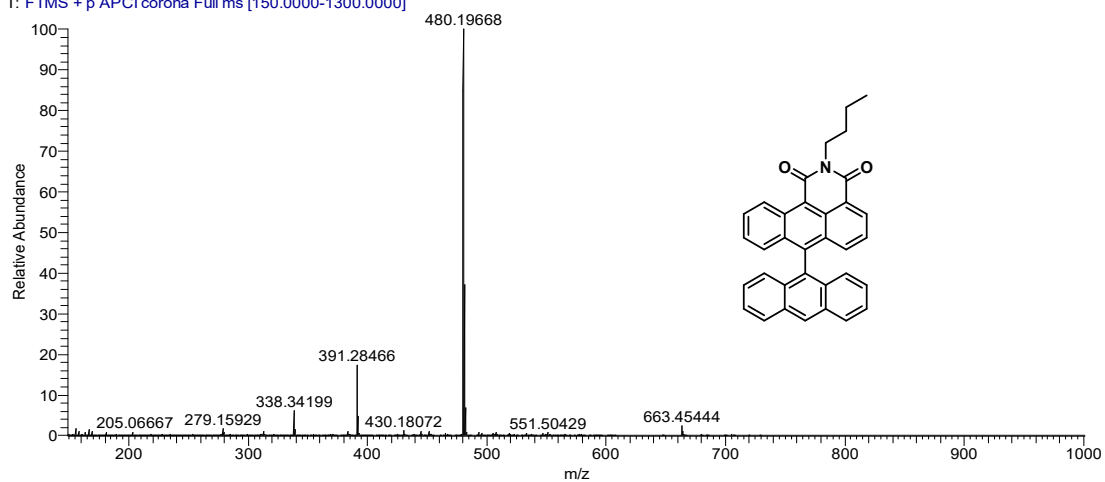

Figure. S12. HRMS of AN-ACI.

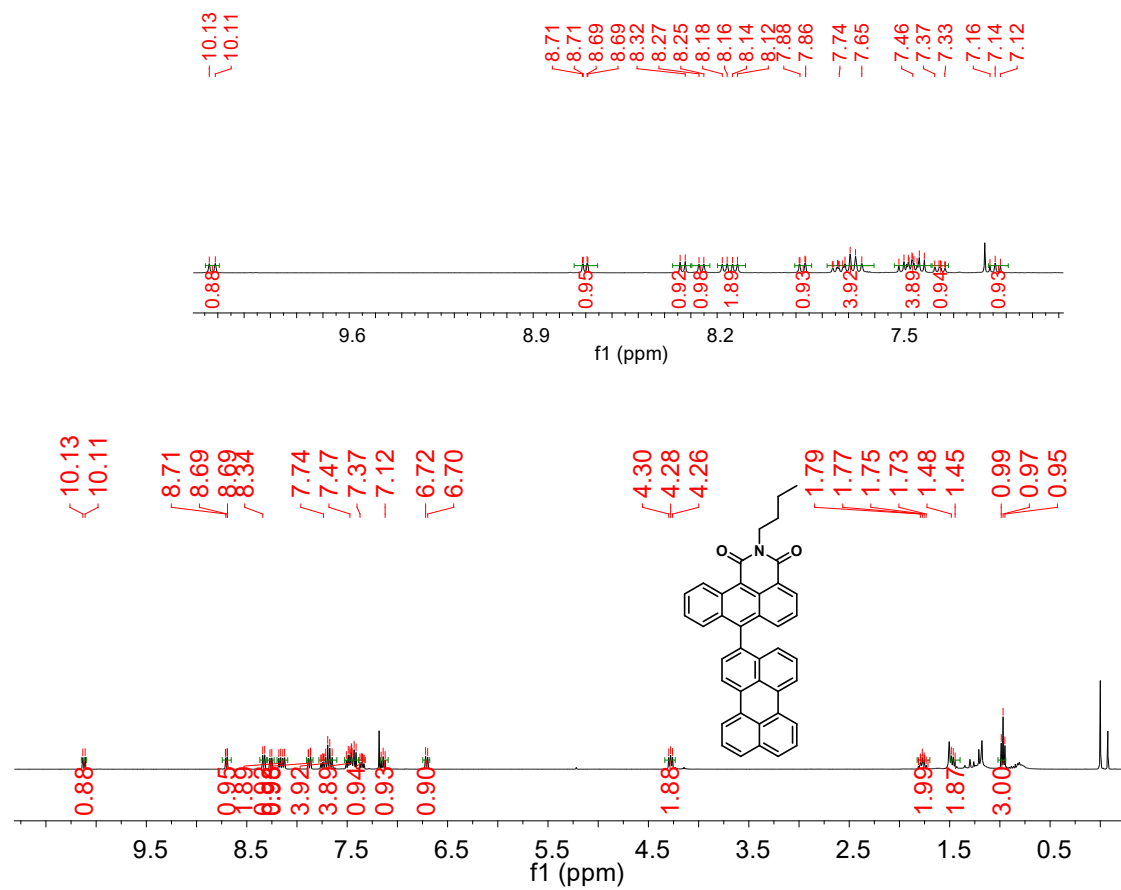

Figure. S13. <sup>1</sup>H NMR of PY-ACI (CDCl<sub>3</sub>, 400 MHz).

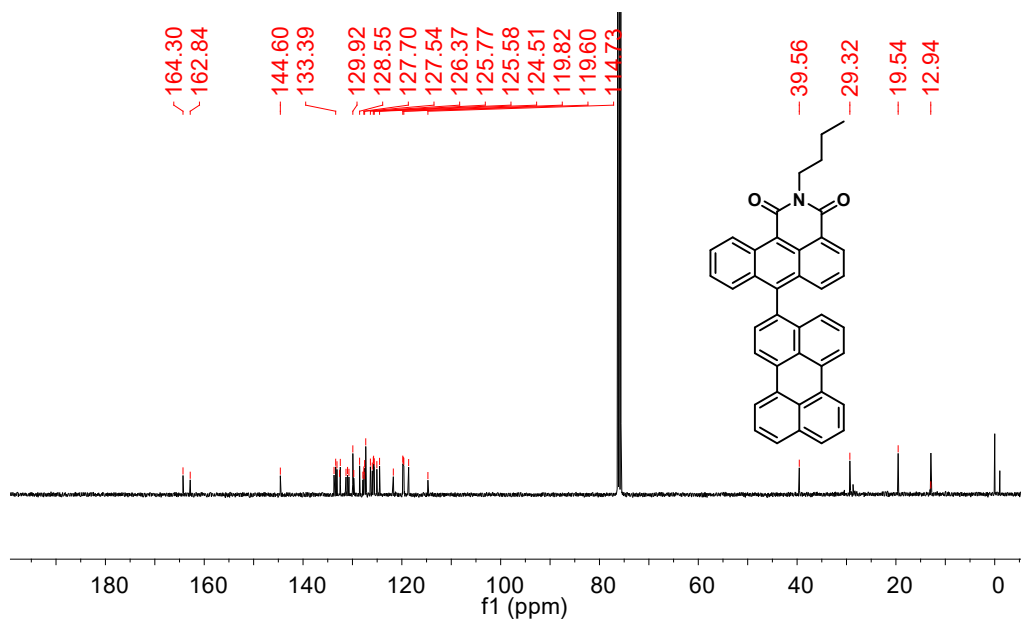

**Figure. S14.**  $^{13}\text{C}$  NMR of PY-ACI ( $\text{CDCl}_3$ , 100 MHz).

Py-AI#15 RT: 0.15 AV: 1 SB: 16 0.01-0.03, 0.28-0.55 NL: 5.58E6  
T: FTMS + p APCI corona Full ms [150.0000-1300.0000]

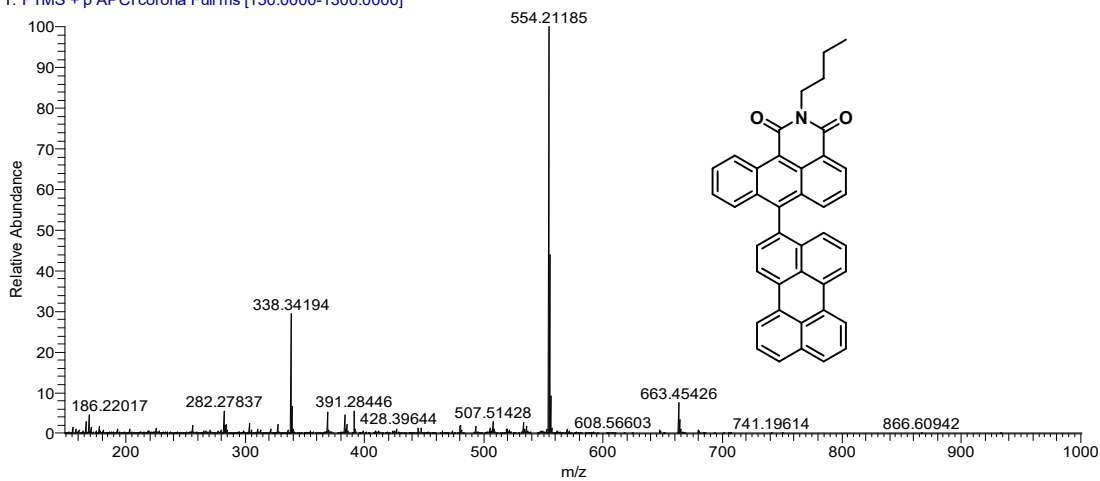

**Figure. S15.** HRMS of PY-ACI.

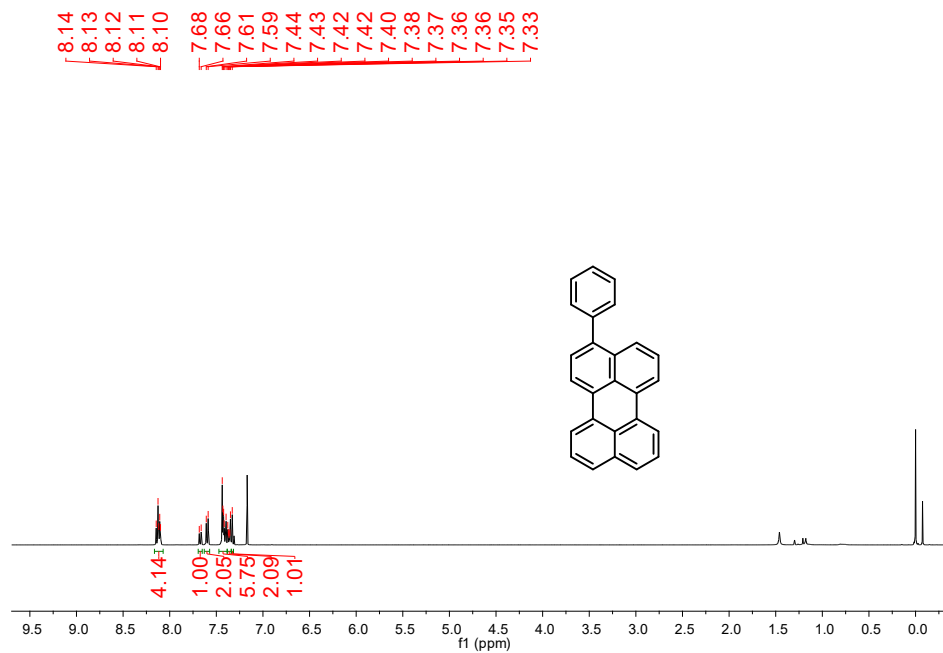

**Figure. S16.**  $^1\text{H}$  NMR of **PY-Ph** ( $\text{CDCl}_3$ , 400 MHz).

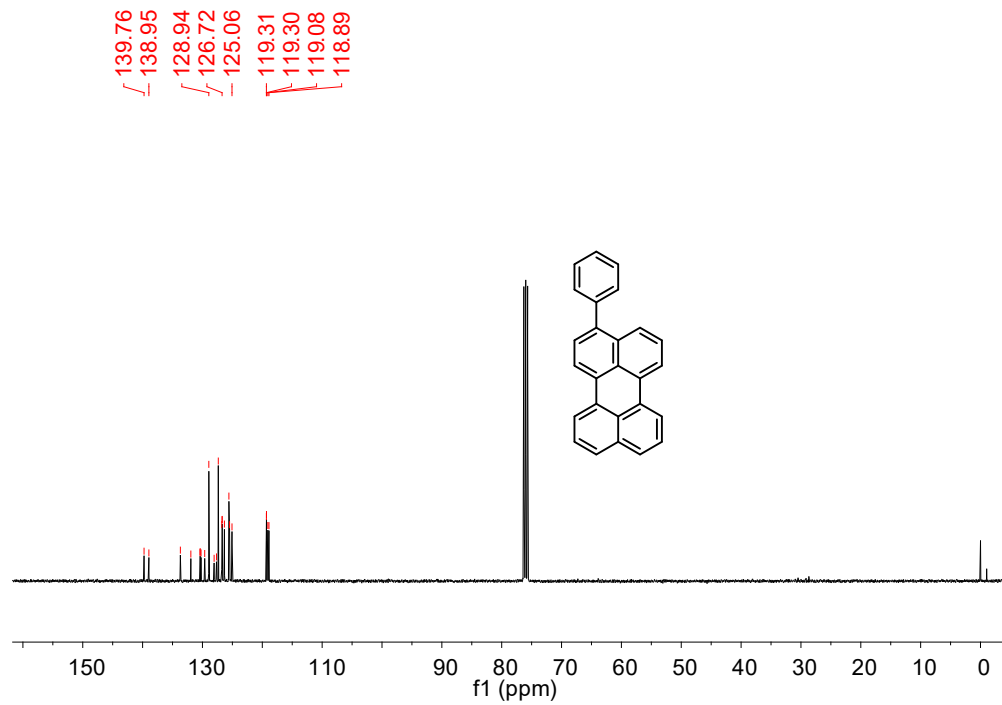

**Figure. S17.**  $^{13}\text{C}$  NMR of **PY-Ph** ( $\text{CDCl}_3$ , 100 MHz).

Py-ph #7 RT: 0.07 AV: 1 SB: 16 0.01-0.03, 0.28-0.56 NL: 1.70E7  
T: FTMS + p APCI corona Full ms [150.0000-1300.0000]

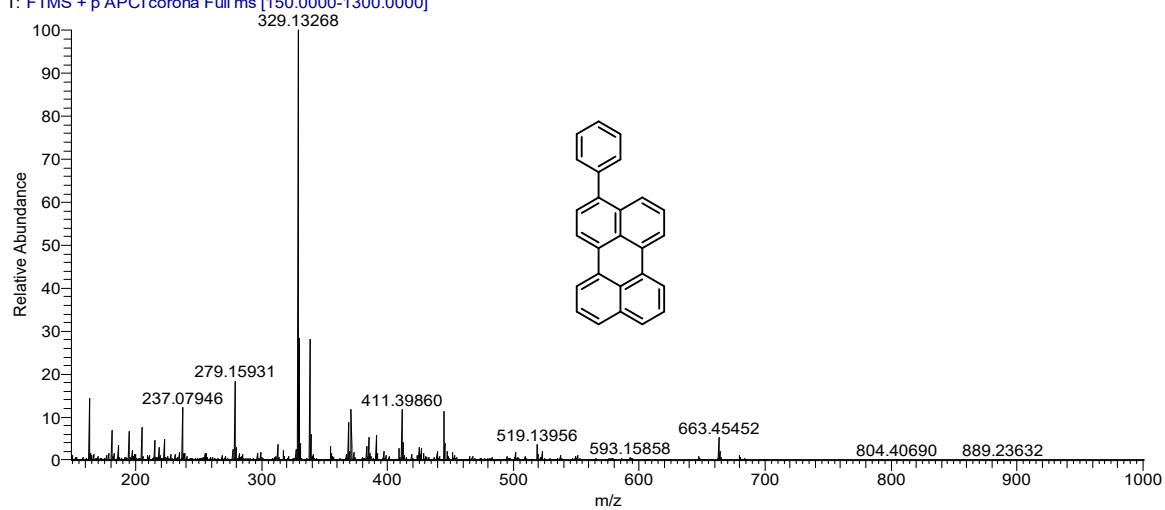

Figure. S18. HRMS of PY-Ph.

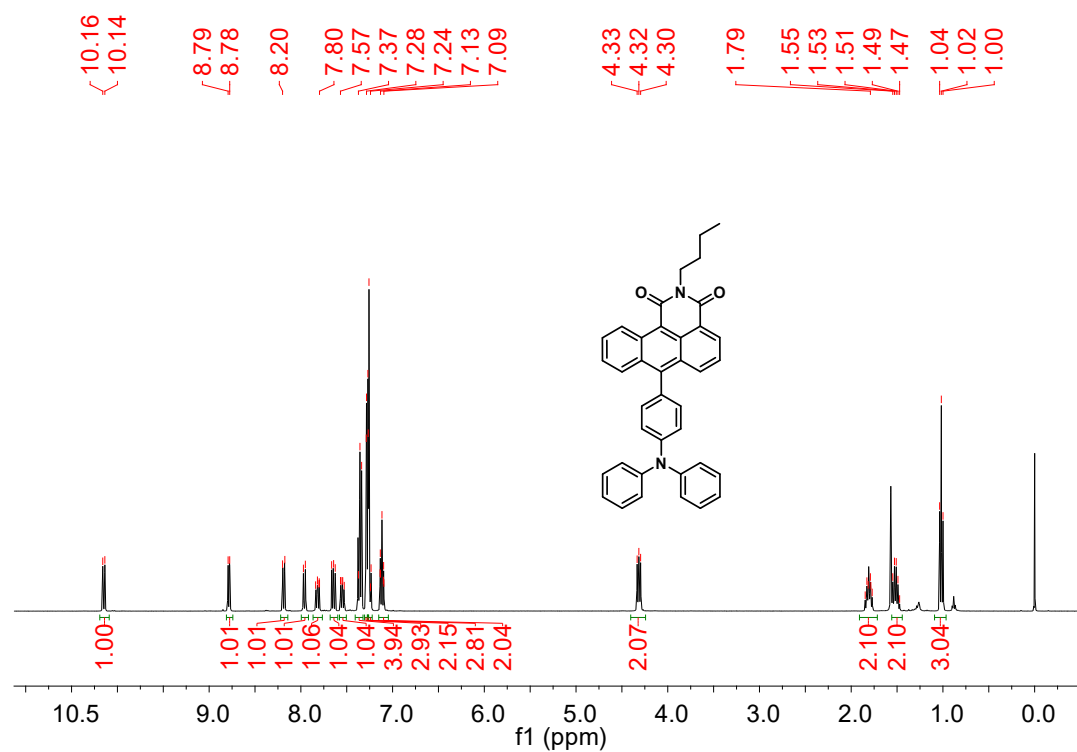

Figure. S19. <sup>1</sup>H NMR of TPA-ACI (CDCl<sub>3</sub>, 400 MHz).



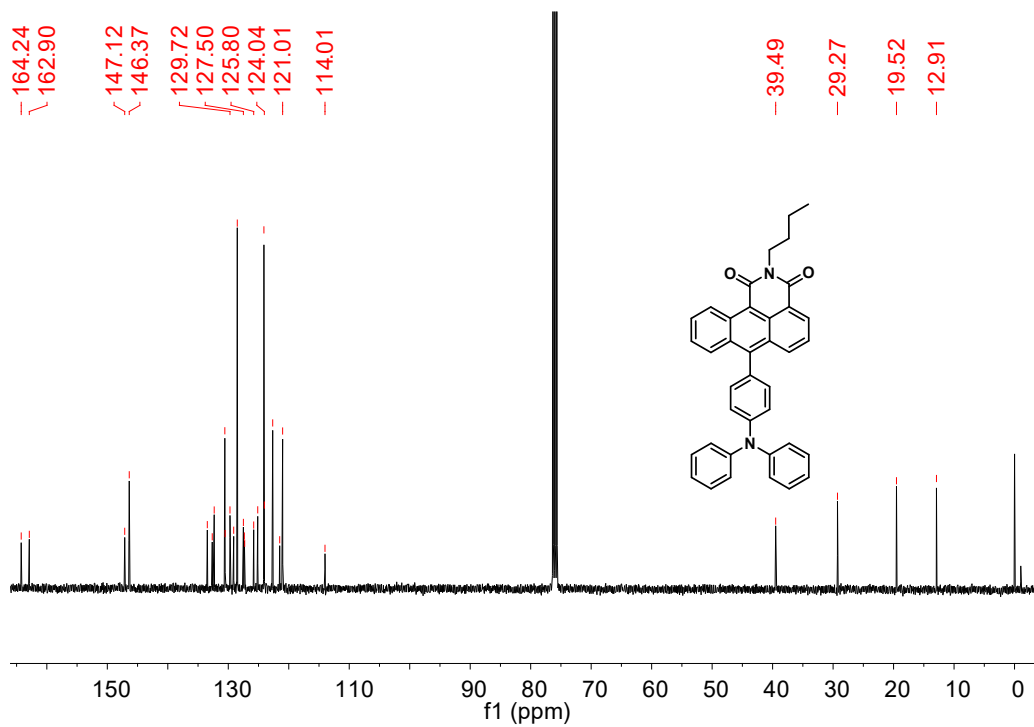

Figure.S20. <sup>13</sup>C NMR of PY-Ph (CDCl<sub>3</sub>, 100 MHz).

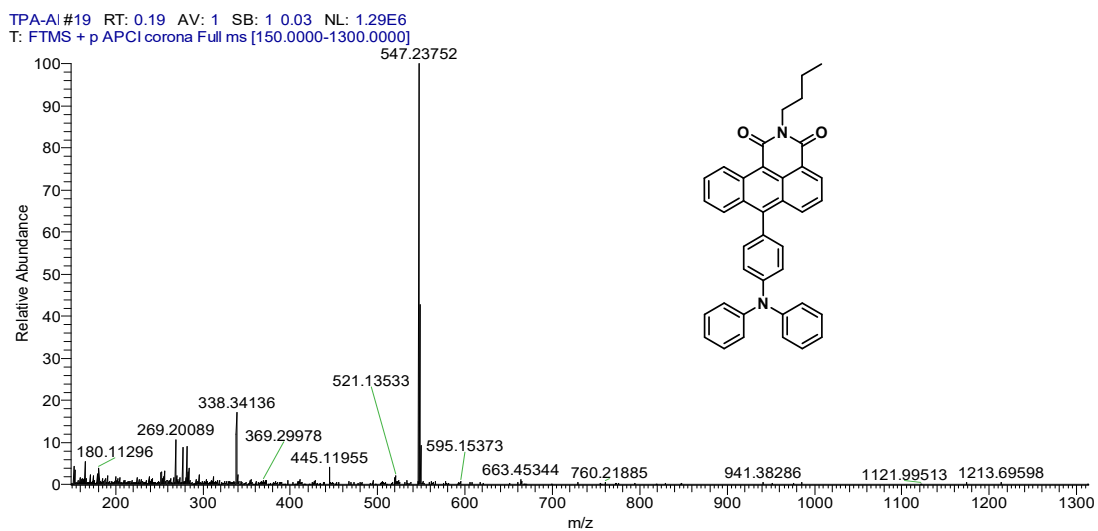

Figure. S21. HRMS of TPA-ACI

### 3. Fluorescence emission spectra

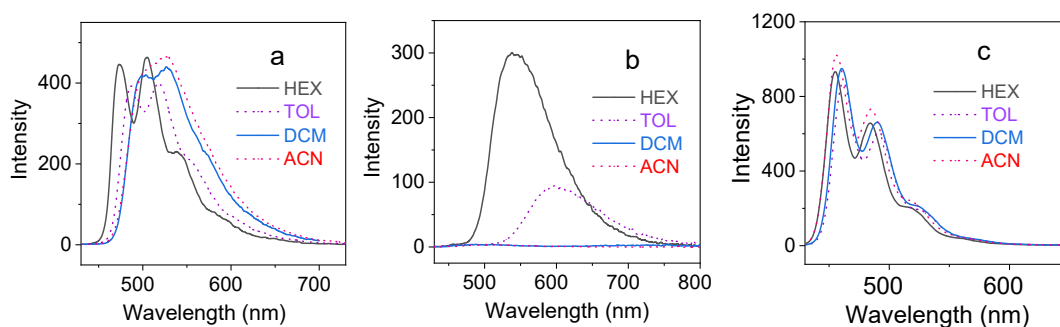

**Figure. S22** Fluorescence emission spectra of (a) **Ph-ACI**, (b) **PY-ACI**, (c) **PY-Ph** in different solvents, optically matched solutions were used ( $A = 0.088$ ).  $\lambda_{\text{ex}} = 420$  nm, 25 °C. “HEX” stands for *n*-hexane, “TOL” stands for toluene, “DCM” stands for dichloromethane and “ACN” stands for acetonitrile.

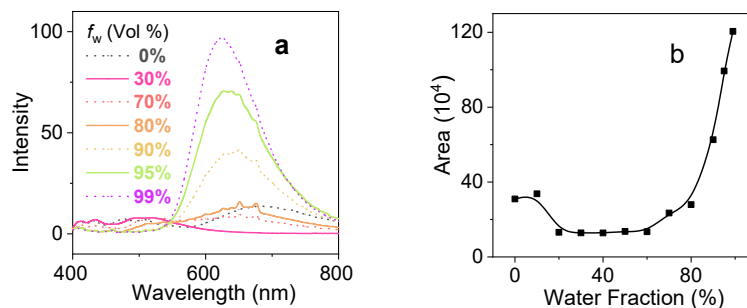

**Figure. S23** Fluorescence emission spectra of **TPA-ACI** in THF/water mixtures with different water fractions ( $f_w$ ).  $\lambda_{\text{ex}} = 420$  nm, 25 °C (b) Integral area of **TPA-ACI** in in THF/water mixtures with different water fractions.

#### 4. Fluorescence emission decay curves.

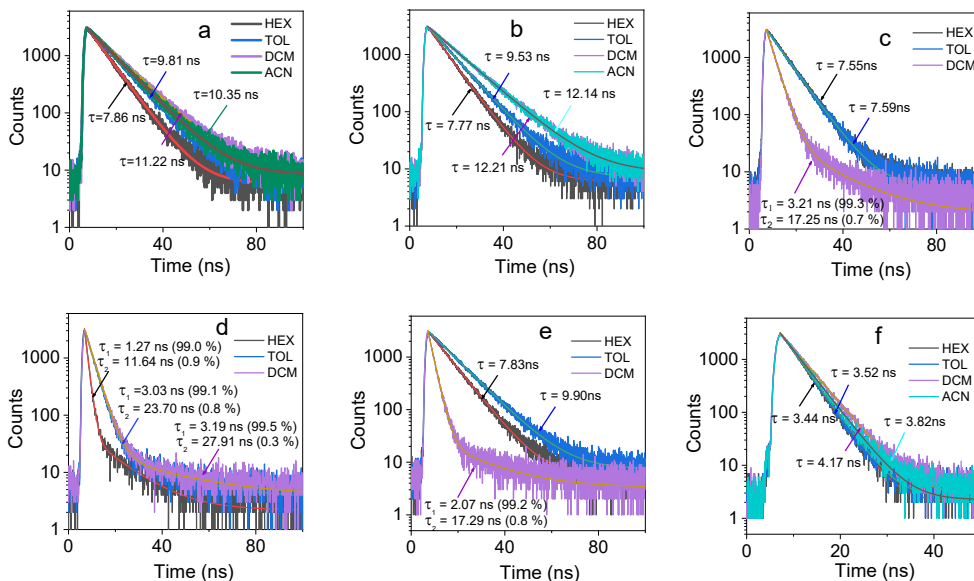

**Figure. S24** Fluorescence decay curves of (a) **Ph-ACI**, (b) **NP-ACI**, (c) **AN-ACI**, (d) **TPA-ACI**, (e) **PY-ACI** and (f) **PY-Ph** monitored at emission maxima,  $\lambda_{\text{ex}} = 441 \text{ nm}$ ,  $c = 1 \times 10^{-5} \text{ M}$ .

**Table. S1** Singlet oxygen quantum yield ( $\Phi_{\Delta}$ ) of compounds in different solvents.

|            | <b>Ph-ACI</b>  | <b>NP-ACI</b> | <b>AN-ACI</b> | <b>PY-ACI</b>  | <b>TPA-ACI</b> |
|------------|----------------|---------------|---------------|----------------|----------------|
| <b>HEX</b> | 12%            | 16%           | 20%           | 19%            | — <sup>a</sup> |
| <b>TOL</b> | 11%            | 13%           | 59%           | 77%            | — <sup>a</sup> |
| <b>DCM</b> | 3%             | 8%            | 99%           | 60%            | — <sup>a</sup> |
| <b>ACN</b> | — <sup>a</sup> | 13%           | 28%           | — <sup>a</sup> | — <sup>a</sup> |

“HEX” stands for n-hexane, “TOL” stands for toluene, “DCM” stands for dichloromethane and “ACN” stands for acetonitrile, —<sup>a</sup>: not observed, error:  $\pm 2$ .

## 5. Electrochemical Properties

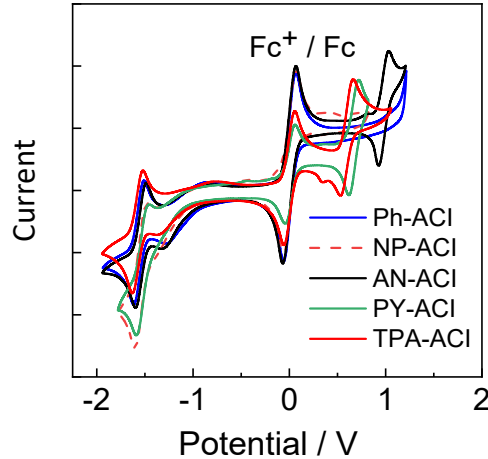

**Figure. S25** Cyclic Voltammograms of (a) **Ph-ACI**, (b) **NP-ACI**, (c) **AN-ACI**, (d) **PY-ACI**, and (e) **TPA-ACI** in  $N_2$  saturated DCM containing a  $Bu_4N[PF_6]$  ( $c=0.1$  M) supporting electrolyte and  $Ag/AgNO_3$  as a reference electrode. Ferrocene (Fc) was used as an internal reference, scan rate:  $50$   $mV s^{-1}$

$$E_{CS} = e [ E_{OX} - E_{RED} ] + \Delta G_S$$

$$\Delta G_S = -\frac{e^2}{4\pi\epsilon_s\epsilon_0 R_{CC}} - \frac{e^2}{8\pi\epsilon_0} \left( \frac{1}{R_D} + \frac{1}{R_A} \right) \left( \frac{1}{\epsilon_{REF}} - \frac{1}{\epsilon_S} \right)$$

$$\Delta G_{CS}^0 = e [ E_{OX} - E_{RED} ] - E_{00} + \Delta G_S$$

$\Delta G_{CS}^0$  is static coulombic energy,  $E_{OX}$  and  $E_{RED}$  represent the half-wave oxidation potential of the electron donor and the half-wave reduction potential of the electron acceptor, respectively,  $E_{00}$  is the energy level at the intersection point of the normalized molecular UV-VIS absorption spectrum and fluorescence emission spectrum,  $R_{CC}$  is the distance from the center of the donor to the center of the acceptor calculated by density functional theory (DFT),  $R_D$  and  $R_A$  represent the radius of the electron donor and electron acceptor in the molecule, respectively.  $\epsilon$  represents the static dielectric constant of the solvent.

## 5. Femtosecond Transient Absorption Spectra

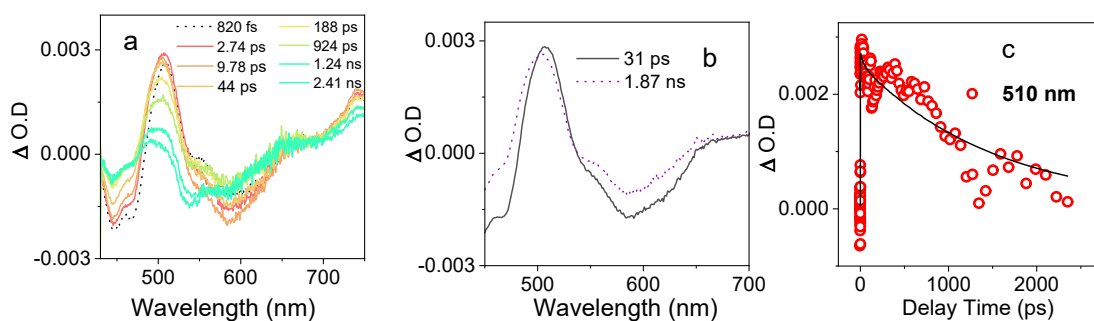

**Figure. S26** (a) Femtosecond transient absorption spectra of **Ph-ACI** in DCM, (b) evolution-associated difference spectra (EADS) obtained from global analysis, and (c) kinetic traces at 510 nm,  $\lambda_{\text{ex}} = 420$  nm, 20 °C

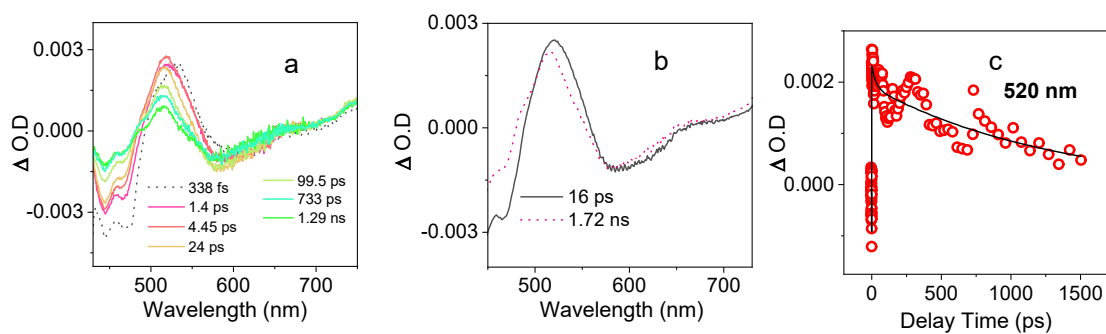

**Figure. S27** (a) Femtosecond transient absorption spectra of **NP-ACI** in DCM, (b) EADS obtained from global analysis, and (c) kinetic traces at selected wavelengths,  $\lambda_{\text{ex}} = 420$  nm, 20 °C

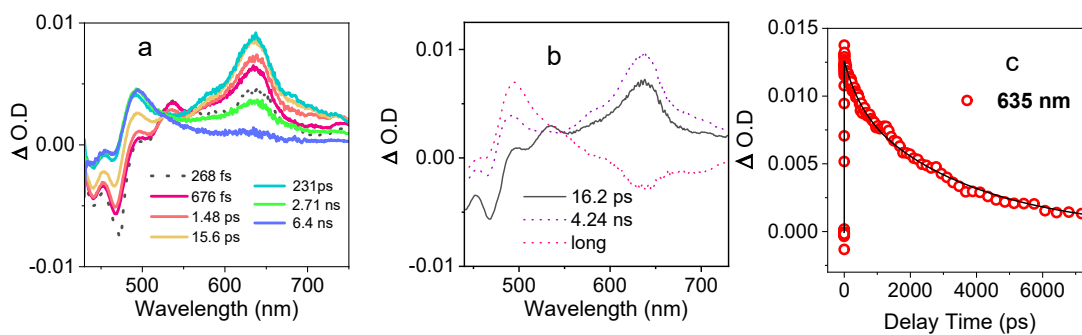

**Figure. S28** Femtosecond transient absorption spectra of AN-ACI in *n*-HEX, (b) EADS obtained from global analysis. and (c) kinetic traces at selected wavelengths,  $\lambda_{\text{ex}} = 420 \text{ nm}$ ,  $20^\circ \text{C}$

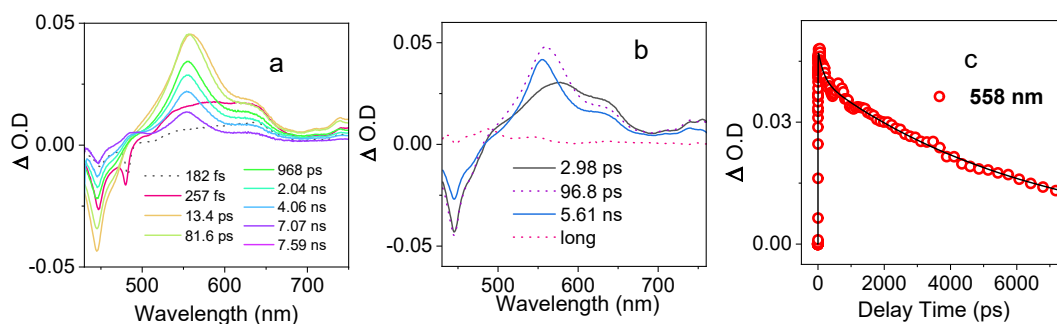

**Figure. S29** (a) Femtosecond transient absorption spectra of PY-ACI in *n*-HEX, (b) EADS obtained from global analysis. and (c) kinetic traces at selected wavelengths,  $\lambda_{\text{ex}} = 420 \text{ nm}$ ,  $20^\circ \text{C}$

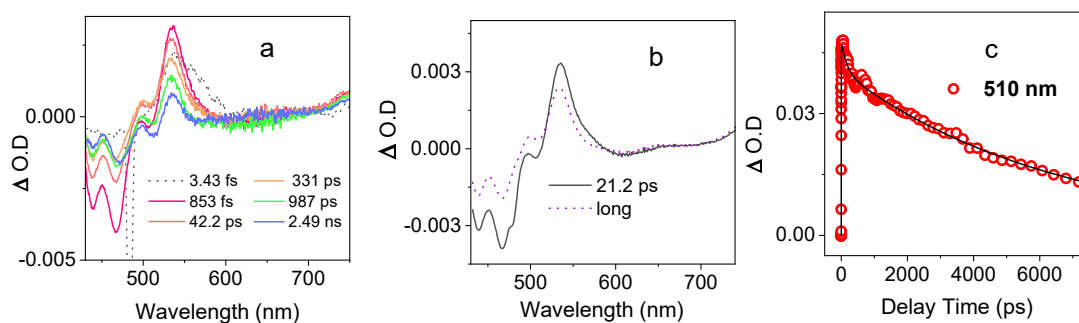

**Figure. S30** (a) Femtosecond transient absorption spectra of NP-ACI in *n*-HEX, (b) EADS obtained from global analysis. and (c) kinetic traces at selected wavelengths,  $\lambda_{\text{ex}} = 420 \text{ nm}$ ,  $20^\circ \text{C}$

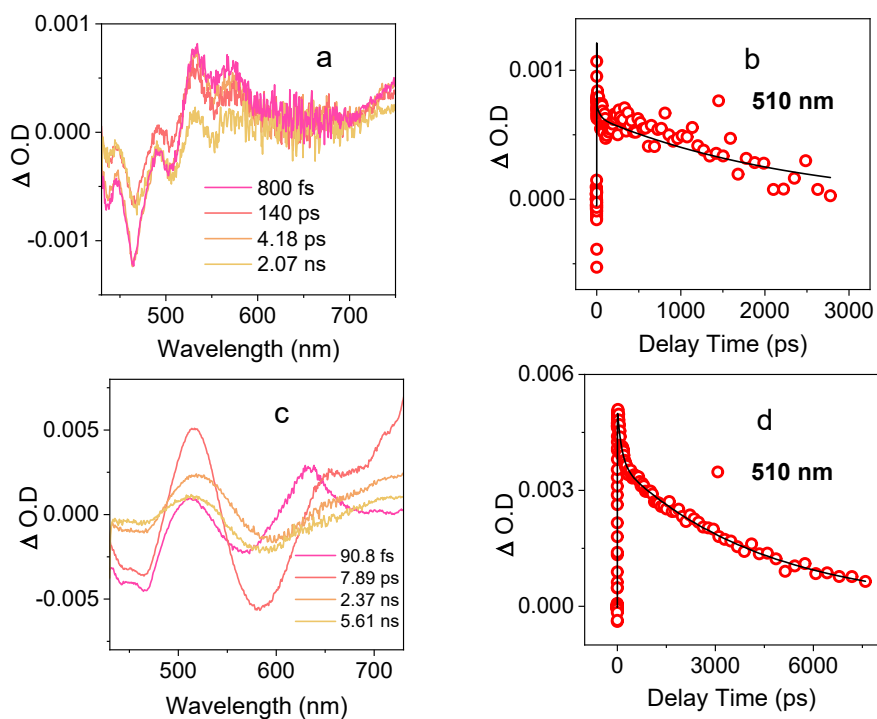

**Figure. S31** (a) Femtosecond transient absorption spectra of **Ph-ACI** in *n*-HEX, (b) kinetic traces at selected wavelengths. (c) Femtosecond transient absorption spectra of **TPA-ACI** in HEX, (d) kinetic traces at selected wavelengths,  $\lambda_{\text{ex}} = 420 \text{ nm}$ ,  $20 \text{ }^\circ\text{C}$

## 6. Nanosecond Transient Absorption Spectra

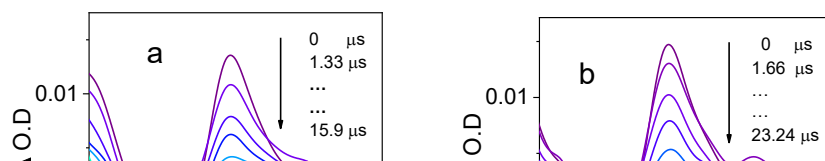

**Figure. S32** Nanosecond time-resolved transient absorption spectra of **Ph-ACI** (a), **NP-ACI** (b), **AN-ACI** (c), **PY-ACI** (d) at different time delay. The decay trace of **Ph-ACI** (e), **NP-ACI** (f), **AN-ACI** (g), **PY-ACI** (h) monitored at 490 nm. Conditions:  $\lambda_{\text{ex}} = 355 \text{ nm}$ ,  $25^\circ\text{C}$ , in *n*-HEX.

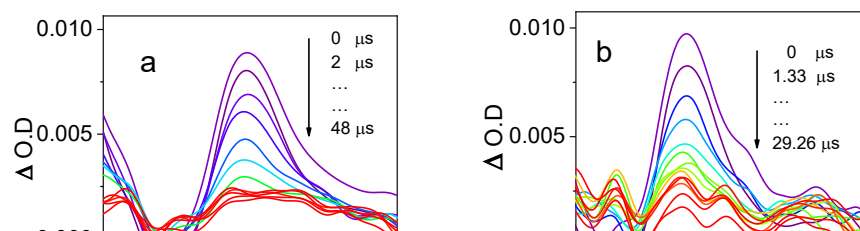



**Figure. S33** Nanosecond time-resolved transient absorption spectra of **Ph-ACI** (a), **NP-ACI** (b), **AN-ACI** (c), **PY-ACI** (d) at different time delay. The decay trace of **Ph-ACI** (e), **NP-ACI** (f), **AN-ACI** (g), **PY-ACI** (h) monitored at 500 nm. Conditions:  $\lambda_{\text{ex}} = 355 \text{ nm}$ ,  $25^\circ\text{C}$ , in TOL.

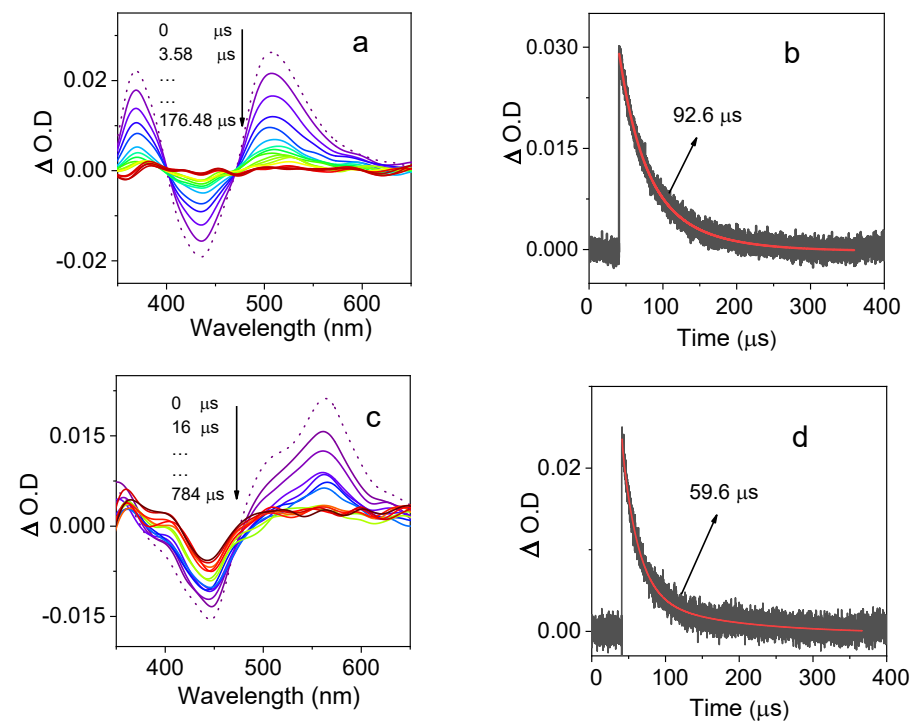

**Figure. S34** Nanosecond time-resolved transient absorption spectra of AN-ACI (a), PY-ACI (c) at different time delays. The decay trace of AN-ACI (b), PY-ACI (d) detected at 500 nm. Conditions:  $\lambda_{\text{ex}} = 355 \text{ nm}$ ,  $25^\circ\text{C}$ , in DCM.

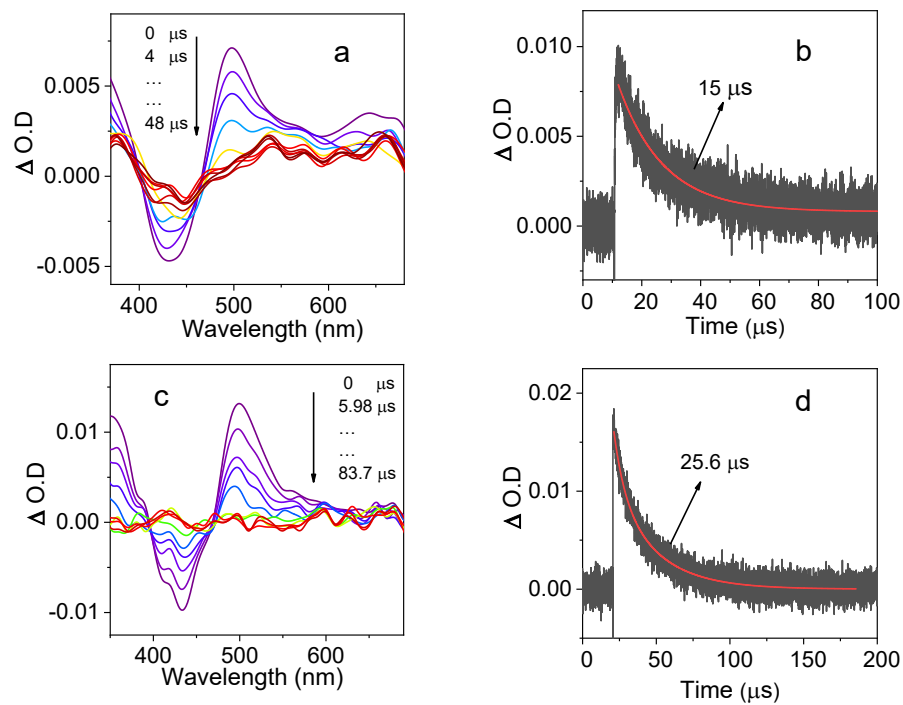

**Figure. S35** Nanosecond time-resolved transient absorption spectra of **NP-ACI** (a) and **AN-ACI** (c) at different time delay. The decay trace of **AN-ACI** (b) recorded at 500 nm. Conditions:  $\lambda_{\text{ex}} = 355 \text{ nm}$ ,  $25^\circ\text{C}$ , in ACN.

## 8. Density Function Theory Calculations

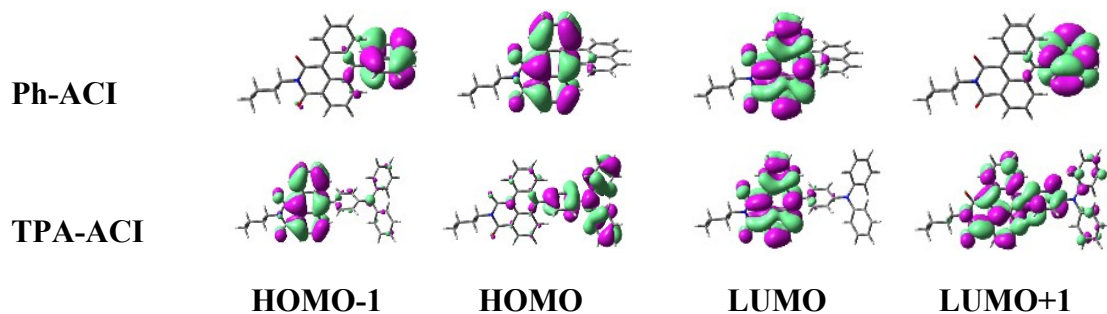

**Fig. S36** Selected frontier molecular orbitals of dyes calculated at the DFT (B3LYP/6-31G(d)) level with Gaussian 09W

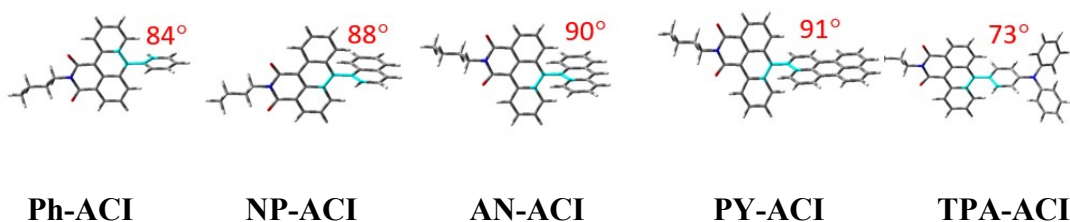

**Fig. S37** Optimized ground state conformations and the dihedral angles between the electron donor and acceptor of the dyads. Calculated at the DFT (B3LYP/6-31G(d)) level with Gaussian 09W.

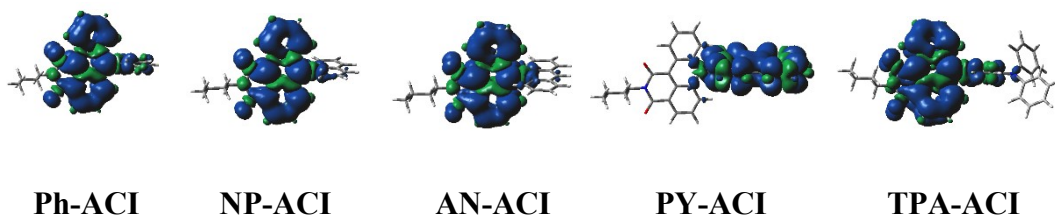

**Figure. S38** Spin density surfaces of the triplet state of the compounds at the optimized triplet state geometry. Calculated at the wb97xd/6-31G(d) level with Gaussian 09W.

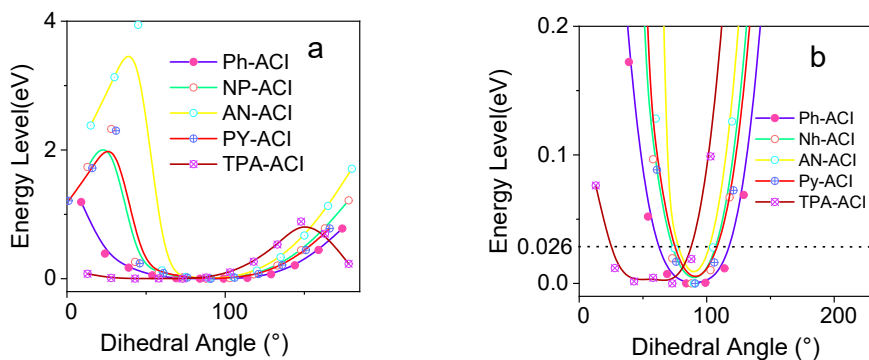

**Figure. S39** (a) Potential energy surface (PES) curves of dyads were calculated at the DFT (B3LYP/6-31G(d)) level with Gaussian 09W. (b) Enlarged view of the PES curves near the minima.

Scheme. S1. Simplified Jablonski Diagram Illustrating the Photophysical Processes with Compounds

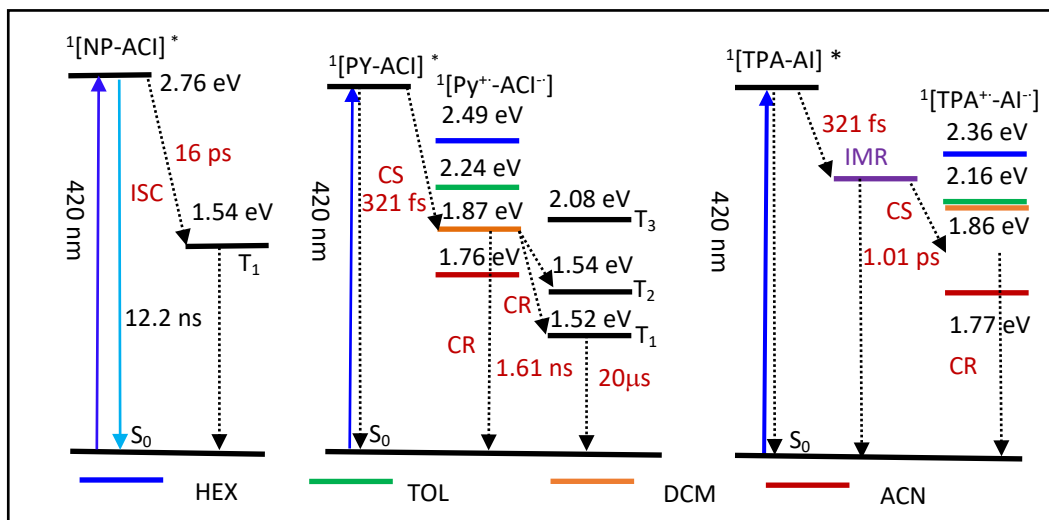

The energy level of CSS, and triplet excited state are derived electrochemical studies, and DFT calculations, respectively.

## 9. Cell Viability

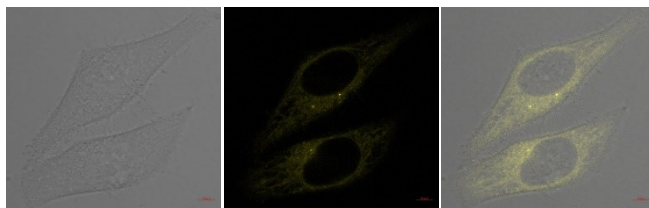

**Figure. S40** Bioimaging picture of the HeLa cell after incubation for 1 hour with photosensitizer (AN-ACI,  $1 \mu\text{g mL}^{-1}$ ),  $\lambda_{\text{ex}} = 480 \text{ nm}$ .

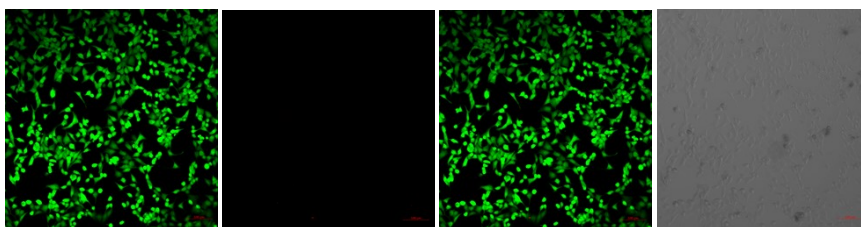

**Figure. S41** Live/dead cell co-staining assay of blank by using calcein-AM with green fluorescence for live cells and PI with red fluorescence for dead cells upon white light irradiation of  $20 \text{ mW cm}^{-2}$  for 5 min. For calcein-AM, the excitation was 488 nm, and the emission filter was 490~540 nm; For PI, the excitation was 543 nm, and the emission filter was 590~680 nm.

## 10. References

1. H. Langhals, G. Schonmann and K. Polborn, *Chemistry*, 2008, **14**, 5290-5303.
2. Z. Gao, B. Han, K. Chen, J. Sun and X. Hou, *Chem. Commun.*, 2017, **53**, 6231-6234.
3. J. Xu, G. Niu, X. Wei, M. Lan, L. Zeng, J. M. Kinsella and R. Sheng, *Dyes Pigment.*, 2017, **139**, 166-173.
